# Supplementary material for: Excess Mortality in a Nationwide Cohort of Cancer Patients during the Initial Phase of the COVID-19 Pandemic in Belgium
Source: Oxford University Press journal article supplement (doi:10.1158/1055-9965.epi-21-0230), 2021-07-07
Supplement: 10559965epi210230-sup-260969_2_supp_7173796_qjdfjf.docx [file 10559965epi210230-sup-260969_2_supp_7173796_qjdfjf.docx]

**Excess mortality in a nationwide cohort of cancer patients during the initial phase of the COVID‑19 pandemic in Belgium**

Geert Silversmit, Freija Verdoodt, Nancy Van Damme, Harlinde De Schutter, Liesbet Van Eycken

**
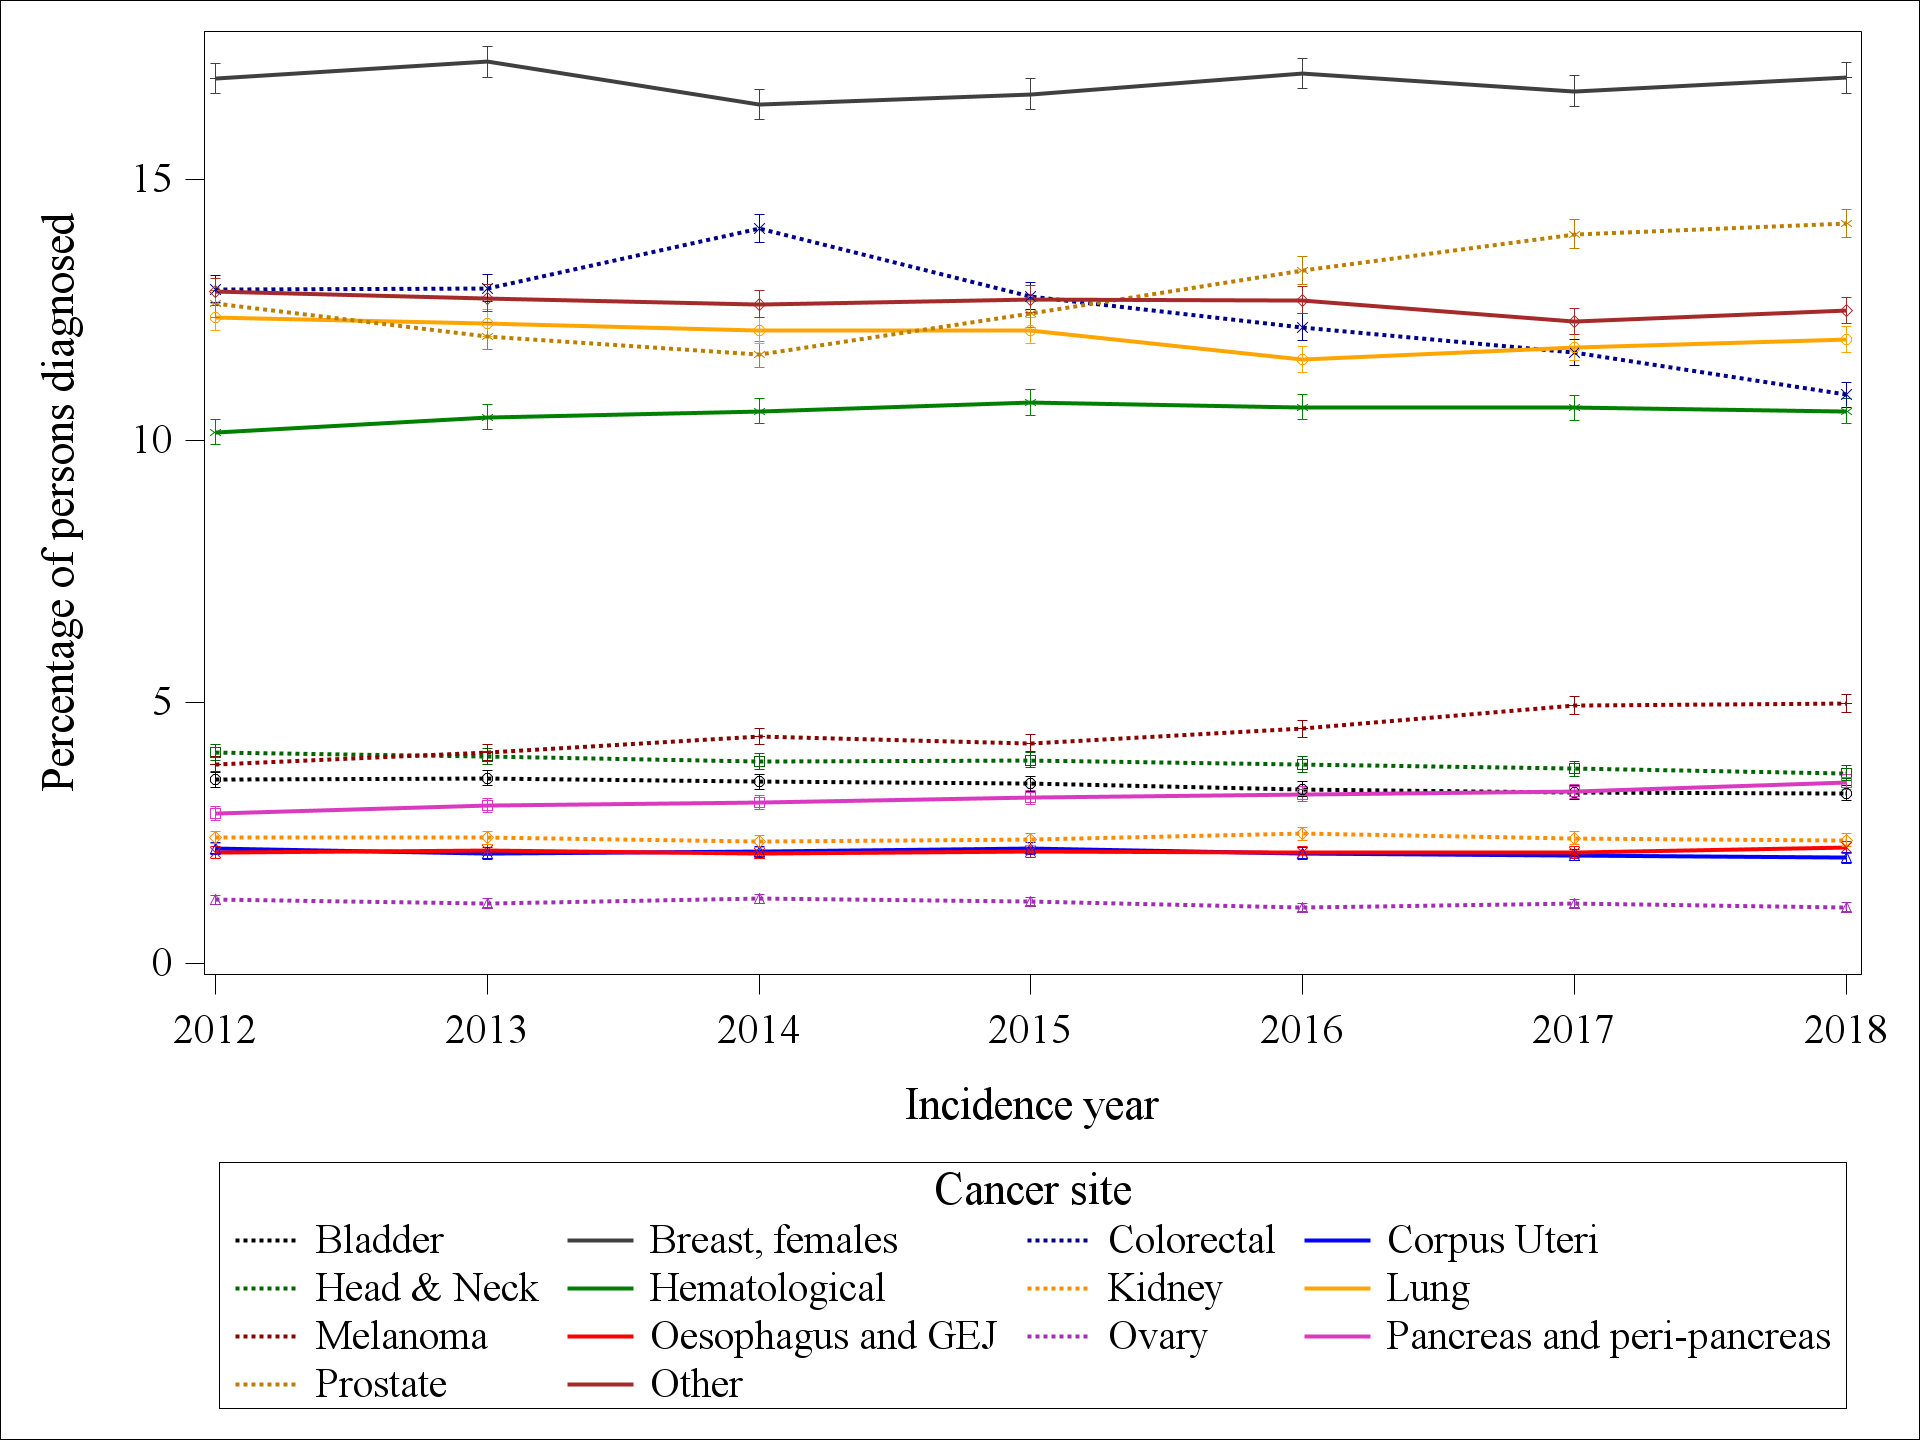
**

**Figure S4**: Cancer site distribution versus incidence year for the 2012-2018 cancer cohort.
